# Supplementary material for: Comparative genomics and transcriptomics of Pichia pastoris
Source: PubMed Central journal article supplement (PMC4974788; doi:10.1186/s12864-016-2876-y), 2016-08-05
Supplement: 12864_2016_2876_MOESM2_ESM.pdf [file 12864_2016_2876_MOESM2_ESM.pdf]

**Additional file 2: Supplementary figures for**  
**Comparative genomics and transcriptomics of *Pichia pastoris***

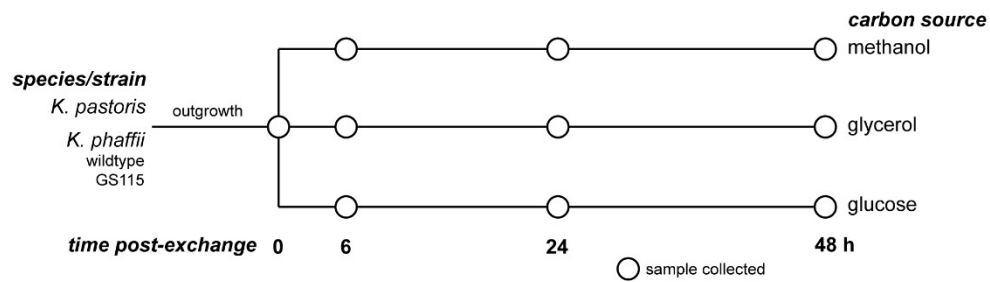

**Figure S1: Experimental timeline for RNA sequencing of *Komagatella* strains.**

Schematic timeline for collection of RNA samples during batch cultivation of strains in shake flasks on 3 different carbon sources. Three independent cultivations were sampled for each time point.

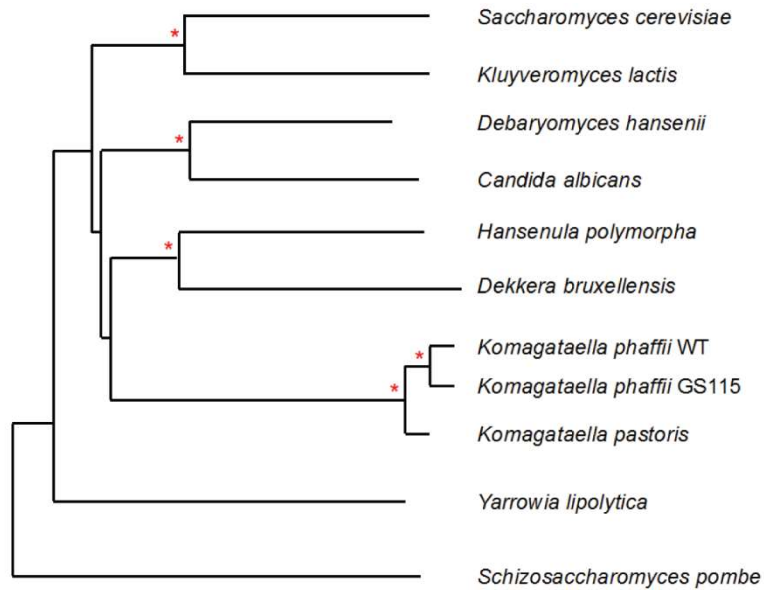

**Figure S2: Phylogenetic comparison of *K. pastoris* and *K. phaffii* to other related yeasts.** Phylogeny was generated using a concatenated, gap-free alignment of ten orthologous proteins. Phylogenetic tree was calculated using neighbor-joining, distance-based, maximum likelihood and maximum parsimony methods; reliability was assessed using bootstrapping. Clades marked with an asterisk are supported by 100% of bootstrap replicates in all four methods.



a) *K. pastoris*

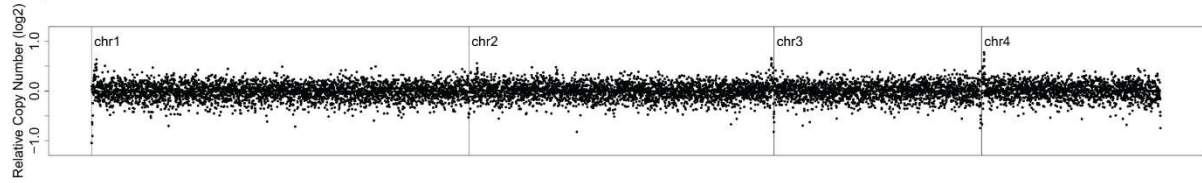

b) *K. phaffii*

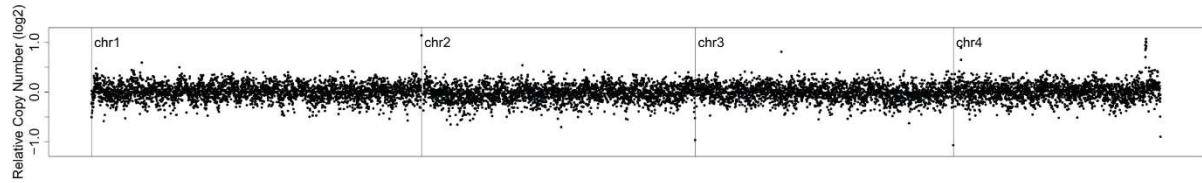

c) *K. phaffii* (GS115)

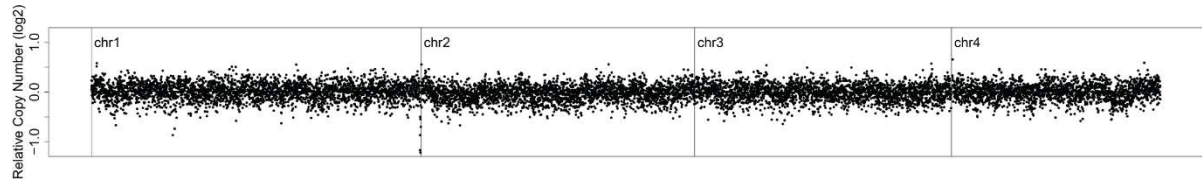

**Figure S4:** Copy number determination for major chromosomes in a) *K. pastoris*, b) *K. phaffii* wild-type and c) *K. phaffii* GS115 strains.

a) *K. pastoris*

|   |     | Second Base |     |      |     | Third Base |     |          |   |
|---|-----|-------------|-----|------|-----|------------|-----|----------|---|
|   |     | U           | C   | A    | G   |            |     |          |   |
| U | UUU | 1.14        | UCU | 1.56 | UAU | 1.03       | UGU | 1.24     | U |
|   | UUC | 0.86        | UCC | 1.04 | UAC | 0.97       | UGC | 0.76     | C |
|   | UUA | 1.07        | UCA | 1.25 | UAA | Set 0.00   | UGA | Set 0.00 | A |
|   | UUG | 1.71        | UCG | 0.57 | UAG | Set 0.00   | UGG | 1.00     | G |
| C | CUU | 1.02        | CCU | 1.35 | CAU | 1.23       | CGU | 0.84     | U |
|   | CUC | 0.51        | CCC | 0.73 | CAC | 0.77       | CGC | 0.32     | C |
|   | CUA | 0.76        | CCA | 1.51 | CAA | 1.20       | CGA | 0.72     | A |
|   | CUG | 0.93        | CCG | 0.41 | CAG | 0.80       | CGG | 0.32     | G |
| A | AUU | 1.38        | ACU | 1.46 | AAU | 1.07       | AGU | 0.95     | U |
|   | AUC | 0.91        | ACC | 0.96 | AAC | 0.93       | AGC | 0.63     | C |
|   | AUA | 0.71        | ACA | 1.09 | AAA | 1.04       | AGA | 2.72     | A |
|   | AUG | Met 1.00    | ACG | 0.49 | AAG | 0.96       | AGG | 1.09     | G |
| G | GUU | 1.55        | GCU | 1.62 | GAU | 1.23       | GGU | 1.43     | U |
|   | GUC | 0.87        | GCC | 0.97 | GAC | 0.77       | GGC | 0.63     | C |
|   | GUA | 0.72        | GCA | 1.09 | GAA | 1.18       | GGA | 1.45     | A |
|   | GUG | 0.87        | GCG | 0.32 | GAG | 0.82       | GGG | 0.49     | G |

b) *K. phaffii*

|   |     | Second Base |     |      |     | Third Base |     |          |   |
|---|-----|-------------|-----|------|-----|------------|-----|----------|---|
|   |     | U           | C   | A    | G   |            |     |          |   |
| U | UUU | 1.16        | UCU | 1.56 | UAU | 1.03       | UGU | 1.24     | U |
|   | UUC | 0.84        | UCC | 1.04 | UAC | 0.97       | UGC | 0.76     | C |
|   | UUA | 1.07        | UCA | 1.25 | UAA | Set 0.00   | UGA | Set 0.00 | A |
|   | UUG | 1.74        | UCG | 0.57 | UAG | Set 0.00   | UGG | 1.00     | G |
| C | CUU | 1.03        | CCU | 1.36 | CAU | 1.23       | CGU | 0.84     | U |
|   | CUC | 0.51        | CCC | 0.72 | CAC | 0.77       | CGC | 0.31     | C |
|   | CUA | 0.74        | CCA | 1.52 | CAA | 1.21       | CGA | 0.72     | A |
|   | CUG | 0.91        | CCG | 0.41 | CAG | 0.79       | CGG | 0.32     | G |
| A | AUU | 1.40        | ACU | 1.46 | AAU | 1.07       | AGU | 0.95     | U |
|   | AUC | 0.89        | ACC | 0.95 | AAC | 0.93       | AGC | 0.63     | C |
|   | AUA | 0.71        | ACA | 1.10 | AAA | 1.04       | AGA | 2.72     | A |
|   | AUG | Met 1.00    | ACG | 0.49 | AAG | 0.96       | AGG | 1.09     | G |
| G | GUU | 1.56        | GCU | 1.60 | GAU | 1.23       | GGU | 1.43     | U |
|   | GUC | 0.86        | GCC | 0.97 | GAC | 0.77       | GGC | 0.63     | C |
|   | GUA | 0.72        | GCA | 1.10 | GAA | 1.19       | GGA | 1.46     | A |
|   | GUG | 0.87        | GCG | 0.32 | GAG | 0.81       | GGG | 0.49     | G |

**Figure S5:** Codon usage for a) *K. pastoris* and b) *K. phaffii* as determined from all coding sequences identified in genome annotation. The relative abundance observed for each codon is represented as a percentage of total codon usage for the corresponding amino acid.

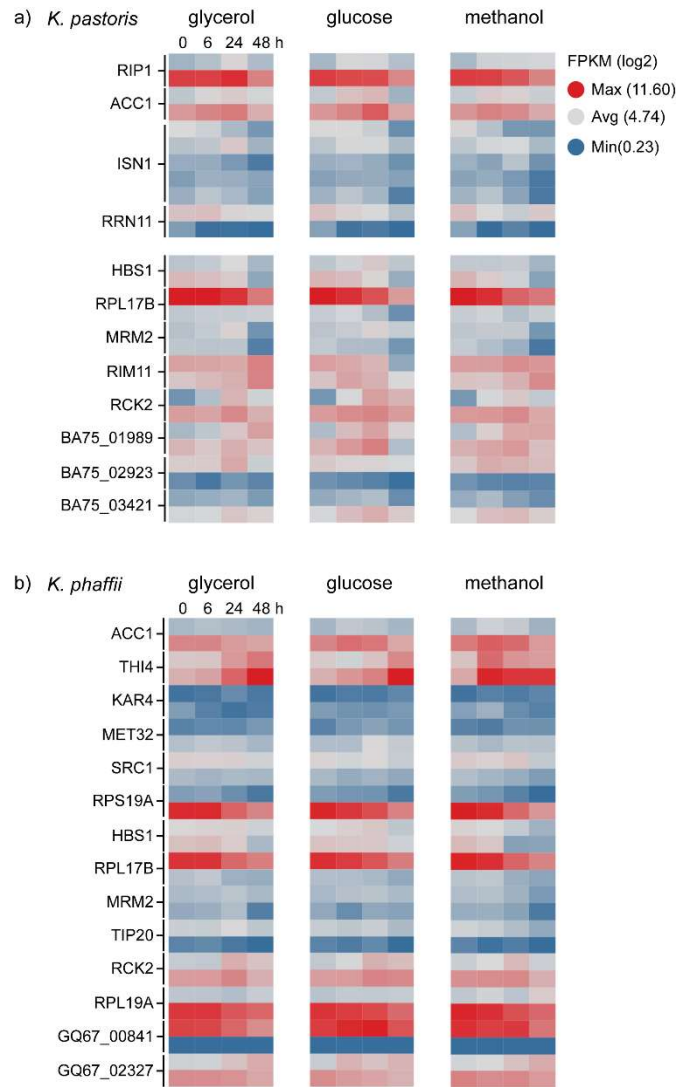

**Figure S6: Isoform expression in *K. pastoris* and *K. phaffii* as a function of cultivation conditions.** Heat maps of gene expression (log2 fpkm) for isoforms of alternatively spliced genes that alter coding sequences in a) *K. pastoris* and b) *K. phaffii* detected in initial genome annotation. Alternatively spliced genes with sufficient homology to *S. cerevisiae* are named, otherwise gene identifiers from genome annotation are used. Isoform expression is shown as a function of batch growth in glycerol, glucose or methanol during a 48 h cultivation period.



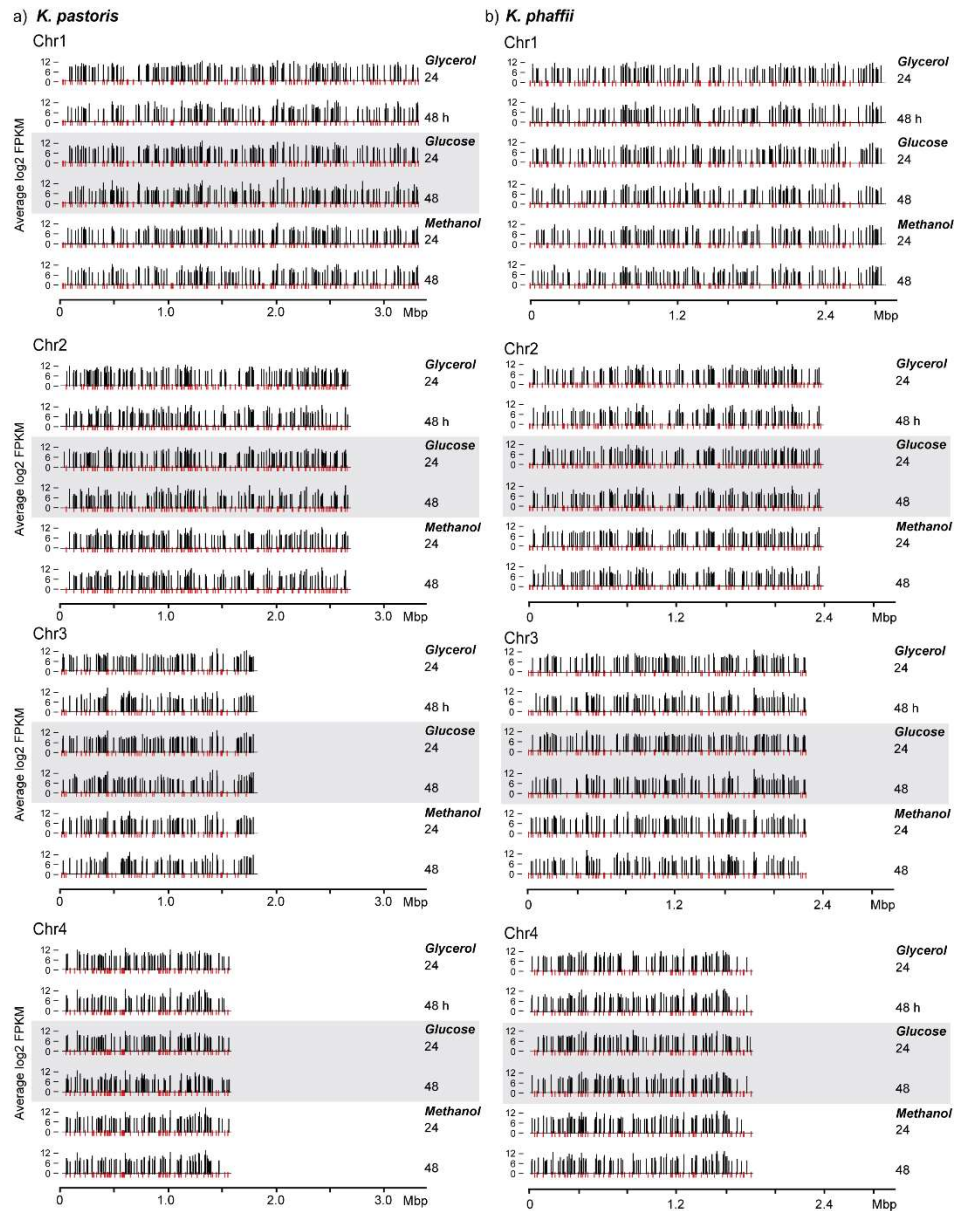

**Figure S7: Chromosomal locations of highly expressed genes.** Map of chromosomal location (base pair identity) for the most highly expressed genes (top 10% expression) in a) *K. pastoris* and b) *K. phaffii*. Black lines indicate gene expression level at 24 h time points during batch cultivation in either glycerol, glucose or methanol. Red lines indicate locations of GC-rich autonomously replicating sequence (GC-ARS) motifs identified by BLAST.

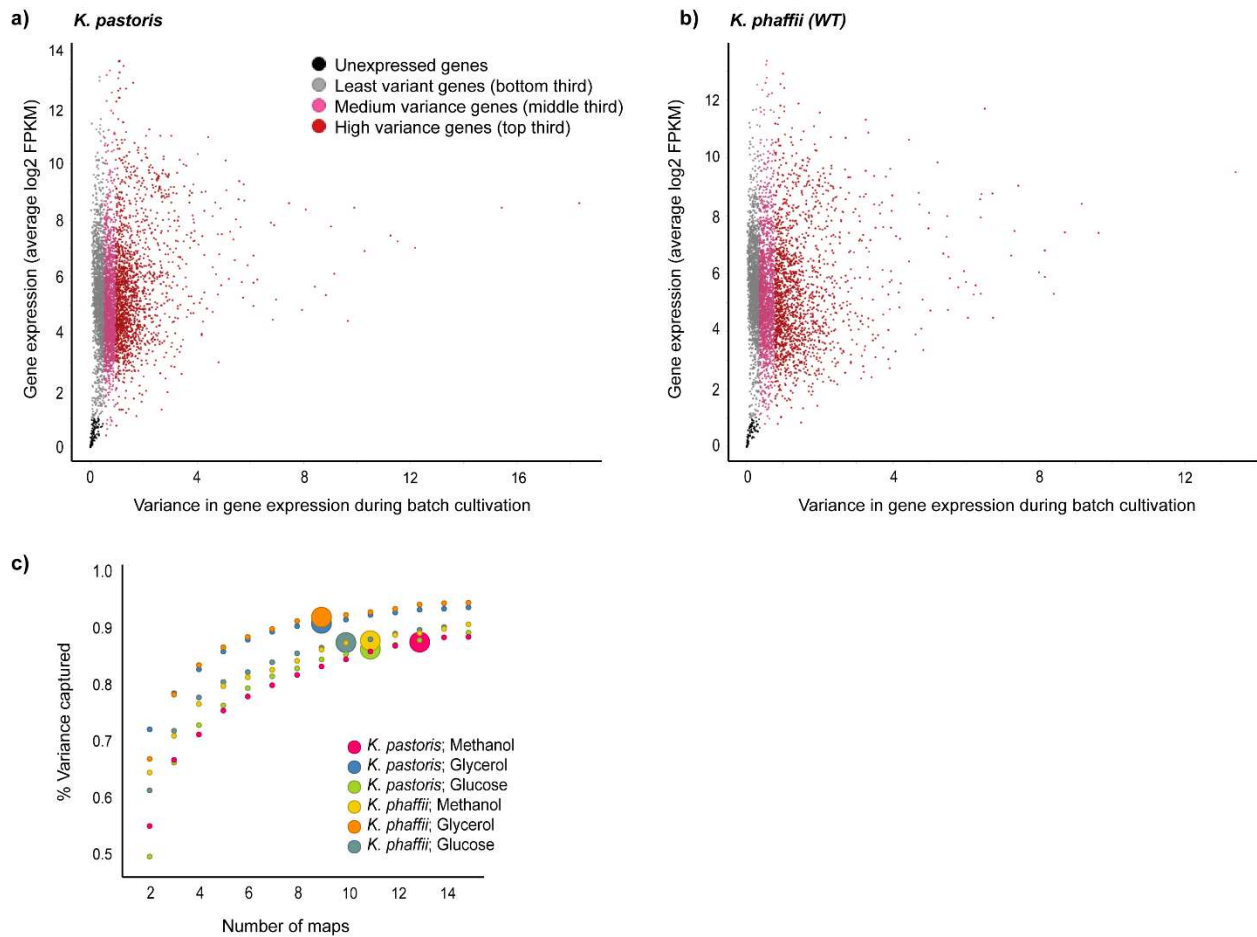

**Figure S8: Variance in gene expression during batch cultivation of *K. pastoris* and *K. phaffii*.** Scatter plots of the average variance versus expression observed for all annotated genes across the 10 conditional averages generated from either a) *K. pastoris* or b) *K. phaffii* expression data. Genes with average log2 fpkm <1 and variance < 0.05 were excluded from further analyses. c) Elbow analysis of input cluster number to identify optimal expression data clustering by self-organizing maps (SOMs). Large circles denote the number of clusters for each expression data set where the additional variance captured by further clustering was < 1%.



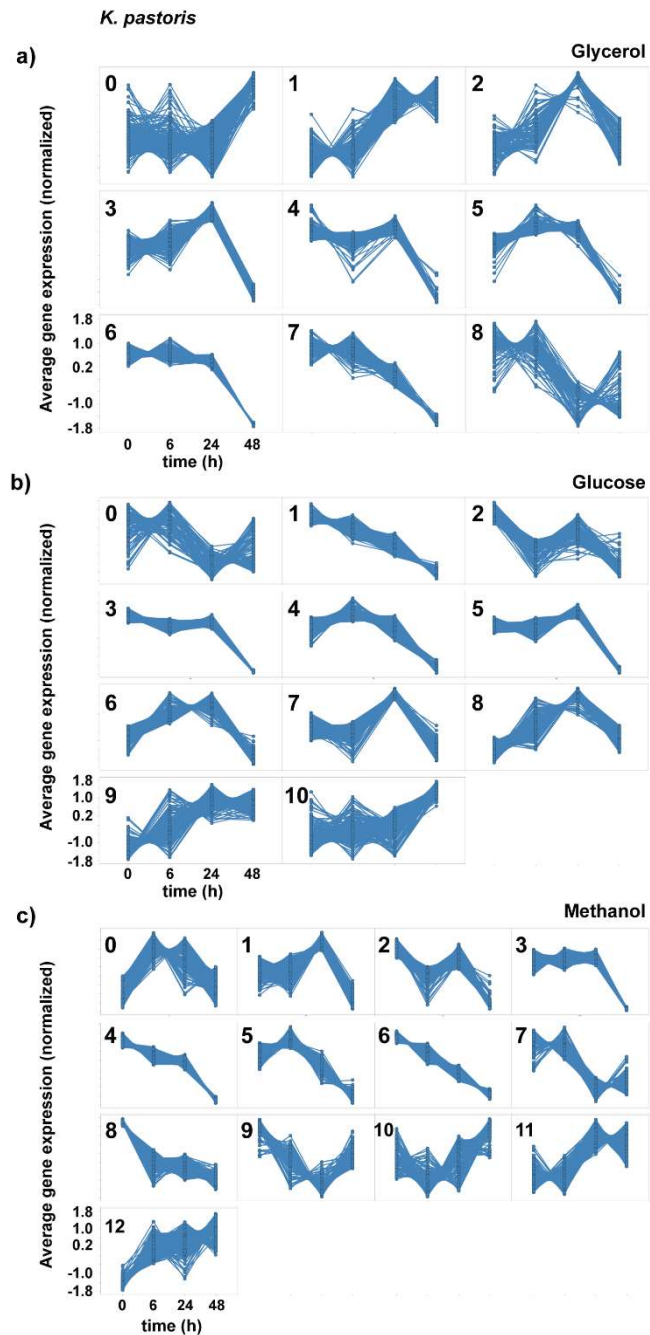

**Figure S9: Gene expression phenotypes in *K. pastoris* as a function of cultivation conditions.** Self-organizing maps (SOMs) of genes changing expression similarly in *K. pastoris* during a 48 h batch cultivation in a) glycerol, b) glucose or c) methanol.

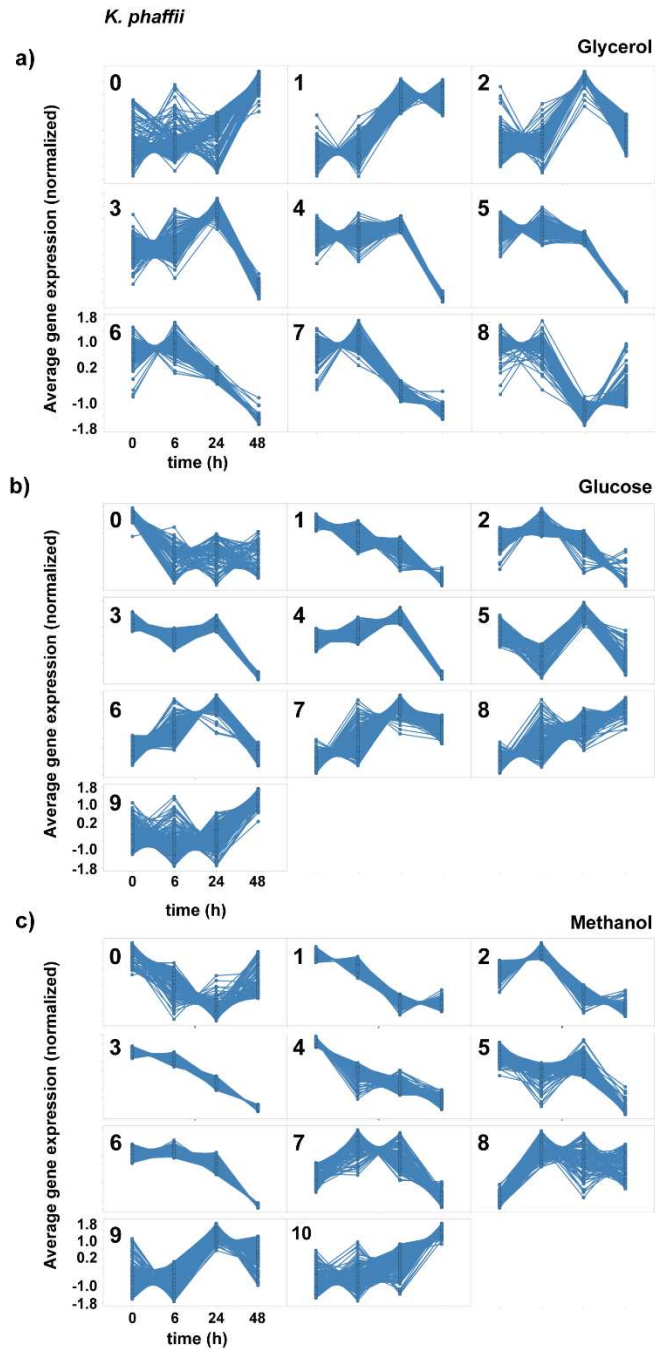

**Figure S10: Gene expression phenotypes in *K. phaffii* as a function of cultivation conditions.** Self-organizing maps (SOMs) of genes changing expression similarly in *K. phaffii* during a 48 h batch cultivation in a) glycerol, b) glucose or c) methanol.

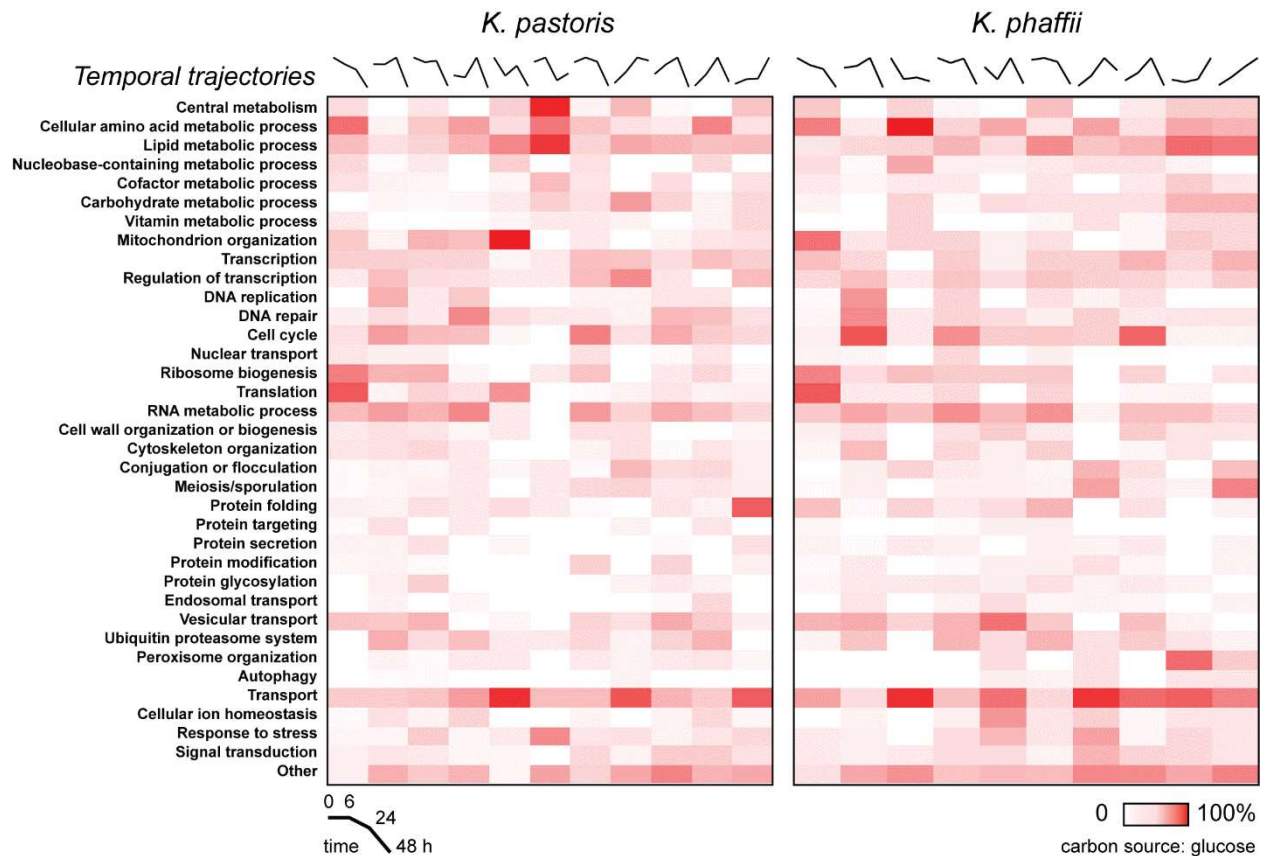

**Figure S11: Biological process enrichment as a function of cultivation in glucose.** Heat map representation of the enrichment of GO biological process terms for expression phenotypes observed in *K. pastoris* and *K. phaffii* during a 48 h batch cultivation in glucose system as characterized by self-organizing maps (SOMs). Representative temporal trajectories of gene expression were generated for each SOM by averaging expression data at each time point for genes present within a given map. Color density relates to the number of genes assigned to a particular process as a percentage of the total number genes present in a particular expression phenotype or map.

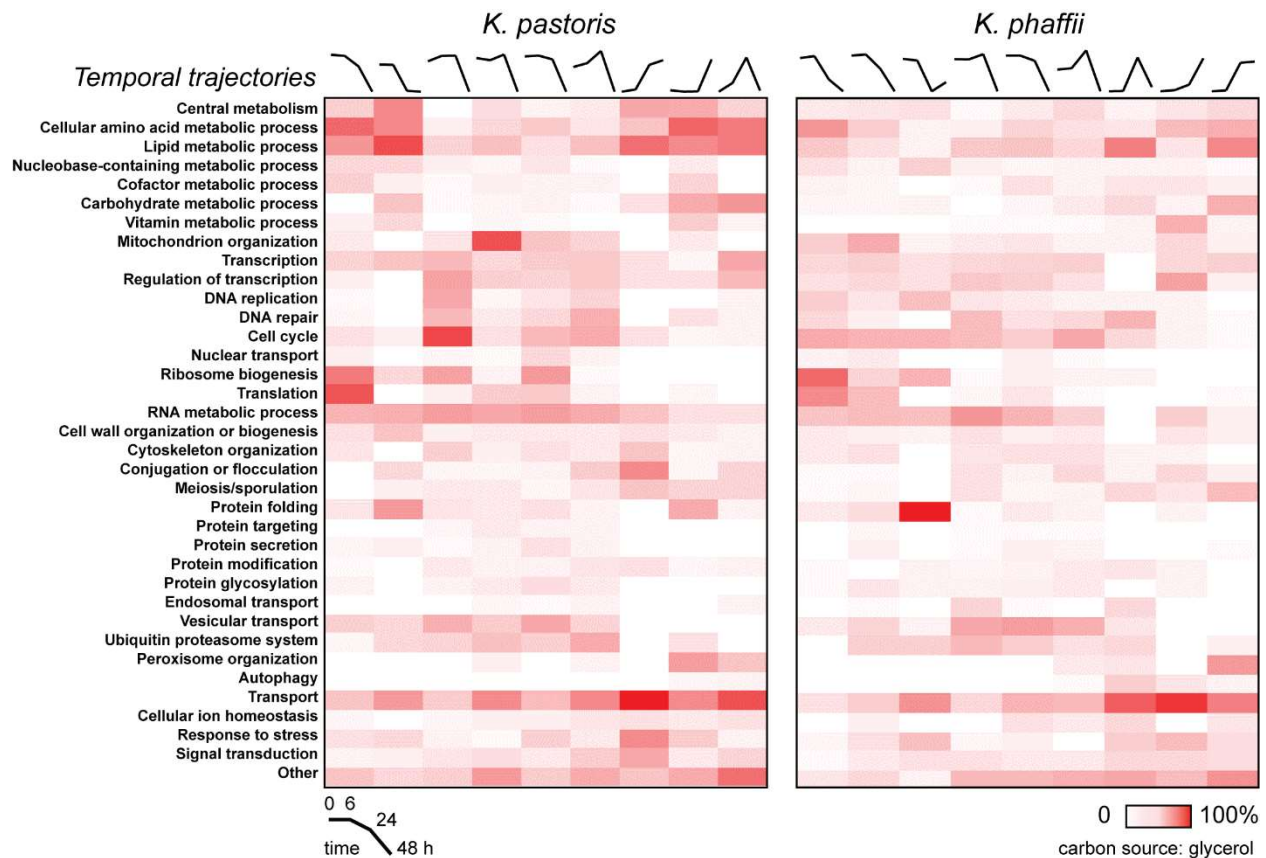

**Figure S12: Biological process enrichment as a function of cultivation in glycerol.** Heat map representation of the enrichment of GO biological process terms for expression phenotypes observed in *K. pastoris* and *K. phaffii* during a 48 h batch cultivation in glycerol as characterized by self-organizing maps (SOMs). Representative temporal trajectories of gene expression were generated for each SOM by averaging expression data at each time point for genes present within a given map. Color density relates to the number of genes assigned to a particular process as a percentage of the total number genes present in a particular expression phenotype or map.

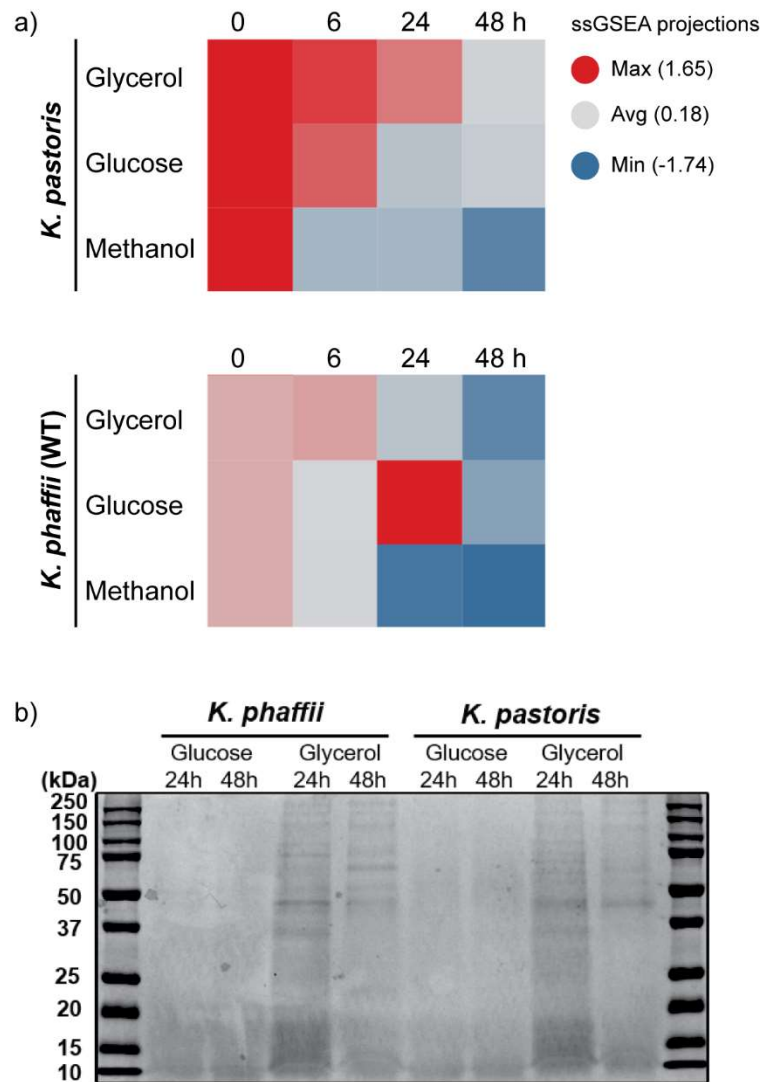

**Figure S13: Secretory pathway protein expression in *K. pastoris* and *K. phaffii*.**

a) Row normalized single set Gene Set Enrichment Analysis (ssGSEA) projections for 170 proteins bearing a signal peptide as identified by Signalp. b) SDS-PAGE analysis of host-cell protein expression in supernatants during batch cultivation of *K. pastoris* and *K. phaffii* for 48h in glucose or glycerol-containing media.



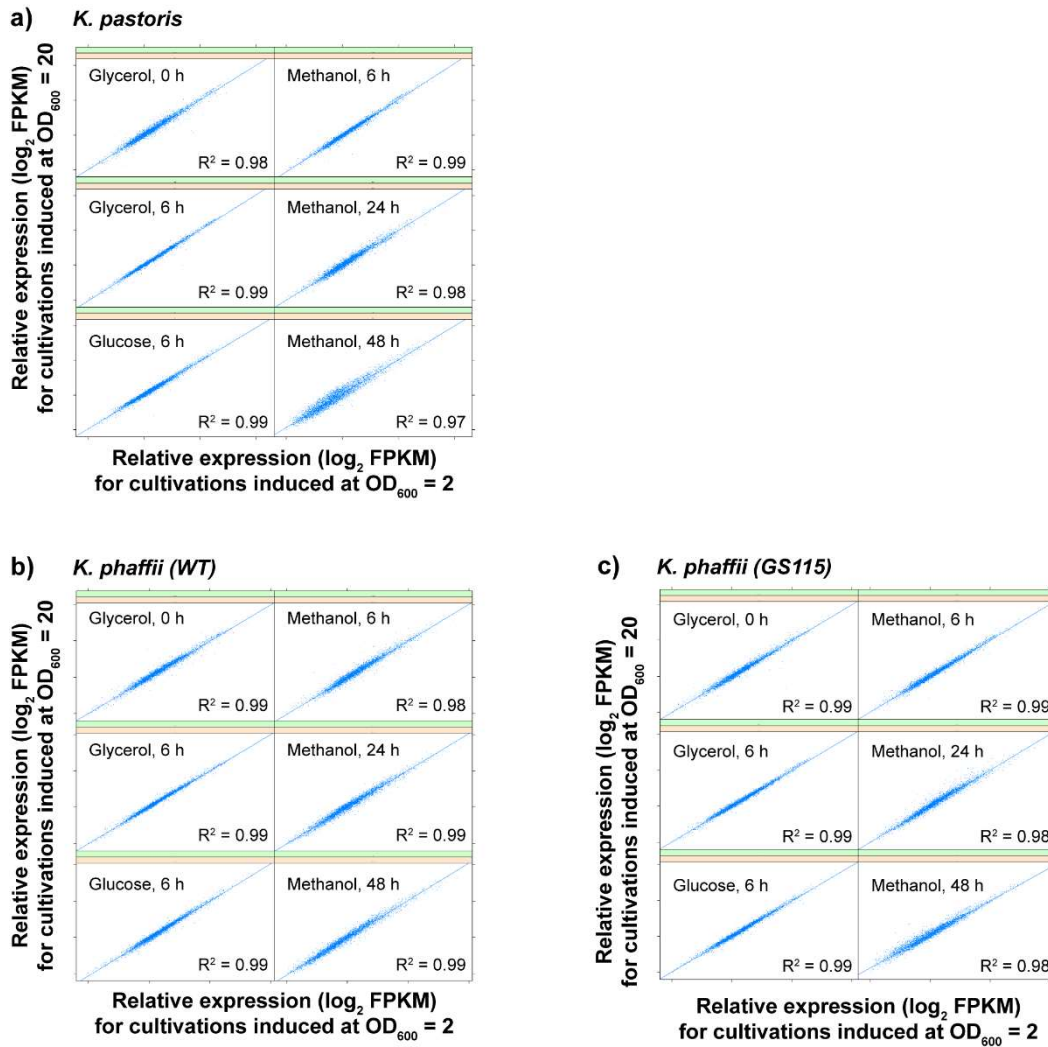

**Figure S14: Correlation of gene expression at two different cultivation densities.**

Scatter plots of gene expression between similar cultivation conditions for a) *K. pastoris*,

b) wildtype *K. phaffii*, and c) *K. phaffii* GS115 grown at two different cell densities.

Density A corresponds to cultures outgrown to  $OD_{600} = 2.0$  prior to sampling and

Density B corresponds to cultures outgrown to  $OD_{600} = 20$  prior to sampling. Pearson

correlation coefficients were calculated from expression vectors that were averages of

three biological replicates for each cultivation condition and density.
