# Supplementary material for: Comparative genomics and transcriptomics of Pichia pastoris
Source: PubMed Central journal article supplement (PMC4974788; doi:10.1186/s12864-016-2876-y), 2016-08-05
Supplement: 12864_2016_2876_MOESM9_ESM.pdf [file 12864_2016_2876_MOESM9_ESM.pdf]

**Table S8: GO annotation of genes that are highly and differentially expressed in a particular carbon source during fermentation.** Genes classified here were highly (top 10% expression) and differentially expressed (log2-fold change > 2, p < 0.05) during fermentation on the carbon source listed.

| <b>Methanol-specific genes</b>        |                        | <b>Glycerol-specific genes</b>        |                        | <b>Glucose-specific genes</b>         |                        |
|---------------------------------------|------------------------|---------------------------------------|------------------------|---------------------------------------|------------------------|
| <b>GO biological process category</b> | <b>Number of genes</b> | <b>GO biological process category</b> | <b>Number of genes</b> | <b>Row Labels</b>                     | <b>Number of genes</b> |
| unassigned (no gene name)             | 80                     | unassigned                            | 24                     | unassigned                            | 17                     |
| transport                             | 16                     | transport                             | 10                     | transport                             | 4                      |
| cellular amino acid metabolic process | 12                     | lipid metabolic process               | 8                      | central metabolism                    | 4                      |
| response to stress                    | 10                     | central metabolism                    | 5                      | lipid metabolic process               | 4                      |
| other                                 | 8                      | cellular amino acid metabolic process | 4                      | cellular amino acid metabolic process | 3                      |
| lipid metabolic process               | 8                      | peroxisome organization               | 3                      | cell wall organization or biogenesis  | 2                      |
| protein folding                       | 7                      | other                                 | 3                      | cofactor metabolic process            | 2                      |
| carbohydrate metabolic process        | 7                      | response to stress                    | 3                      | response to stress                    | 1                      |
| central metabolism                    | 6                      | cell wall organization or biogenesis  | 2                      | unknown                               | 1                      |
| unknown                               | 5                      | carbohydrate metabolic process        | 2                      | RNA metabolic process                 | 1                      |
| peroxisome organization               | 5                      | unknown                               | 2                      | DNA replication                       | 1                      |
| meiosis/sporulation                   | 4                      | DNA replication                       | 1                      | DNA replication                       | 1                      |
| regulation of transcription           | 4                      | ubiquitin proteasome system           | 1                      | carbohydrate metabolic process        | 1                      |
| signal transduction                   | 3                      | cofactor metabolic process            | 1                      | regulation of transcription           | 1                      |
| cofactor metabolic process            | 2                      | protein glycosylation                 | 1                      | protein glycosylation                 | 1                      |
| mitochondrion organization            | 2                      | DNA repair                            | 1                      | Protein folding                       | 1                      |
| cell wall organization or biogenesis  | 2                      | regulation of transcription           | 1                      | <b>Total genes</b>                    | <b>44</b>              |
| transcription                         | 2                      | meiosis/sporulation                   | 1                      |                                       |                        |
| autophagy                             | 2                      | mitochondrion organization            | 1                      |                                       |                        |
| ubiquitin proteasome system           | 2                      | <b>Total genes</b>                    | <b>74</b>              |                                       |                        |
| protein secretion                     | 1                      |                                       |                        |                                       |                        |
| translation                           | 1                      |                                       |                        |                                       |                        |
| cytoskeleton organization             | 1                      |                                       |                        |                                       |                        |

|                                         |            |  |  |
|-----------------------------------------|------------|--|--|
| protein modification                    | 1          |  |  |
| DNA repair                              | 1          |  |  |
| RNA metabolic process                   | 1          |  |  |
| cellular ion homeostasis                | 1          |  |  |
| nucleobase-containing metabolic process | 1          |  |  |
| vesicular transport                     | 1          |  |  |
| vitamin metabolic process               | 1          |  |  |
| conjugation or flocculation             | 1          |  |  |
| ribosome biogenesis                     | 1          |  |  |
| <b>Total genes</b>                      | <b>199</b> |  |  |
