# Supplementary material for: Comparative genomics and transcriptomics of Pichia pastoris
Source: PubMed Central journal article supplement (PMC4974788; doi:10.1186/s12864-016-2876-y), 2016-08-05
Supplement: 12864_2016_2876_MOESM11_ESM.pdf [file 12864_2016_2876_MOESM11_ESM.pdf]

**Table S10: List of mutational variants in GS115 and their potential to affect protein function.** Lower SIFT scores indicate a higher potential for the amino acid affected by the nucleotide change to impact protein function. Scores below the default threshold of 0.05 are highly likely to affect protein function. The differential expression summary column consists of three numbers in x/y/z format, where x corresponds to the number of culture conditions (out of 10 total) where the gene is found to be significantly differentially expressed between GS115 and wildtype *K. phaffii* (log fold change > 2, p < 0.05), y is the number of times the expression comparison tests are significantly higher in wildtype *K. phaffii*, and z is the number of times the expression comparison test are significantly higher in GS115.

| Gene name  | Chromosome | Position | Nucleotide change | Amino acid change | Domain impacted | SIFT score        | Differential expression summary |
|------------|------------|----------|-------------------|-------------------|-----------------|-------------------|---------------------------------|
| MTG1       | chr2       | 1928634  | Gtg/Atg           | V193M             | FeoB_N          | 0.02              | 0/0/0                           |
| YDR131C    | chr2       | 1792171  | aGt/aAt           | S469N             | Outside domain  | 0.51              | 0/0/0                           |
| LOS1       | chr2       | 1158548  | Gtg/Atg           | V56M              | Xpo1            | 0.14              | 0/0/0                           |
| YH93_SCHPO | chr2       | 637700   | Gta/Ata           | V298I             | DUF3844         | N/O               | 0/0/0                           |
| DOP1       | chr2       | 342975   | Ttt/Gtt           | F692V             | Outside domain  | 0.14              | 0/0/0                           |
| VPS35      | chr1       | 2322612  | gCt/gTt           | A681V             | Outside domain  | 0.11              | 0/0/0                           |
| SMI1*      | chr1       | 2282386  | Gtc/Atc           | V157I             | SML1_KNR4       | 0.24              | 0/0/0                           |
| MSS4       | chr1       | 1399834  | aCa/aTa           | T240I             | Outside domain  | 0.01              | 0/0/0                           |
| YMR087W    | chr1       | 942034   | 3'UTR             | N/A               |                 | N/A               | 0/0/0                           |
| CWH43      | chr1       | 786743   | aGt/aAt           | S870N             | Outside domain  | 0.16              | 0/0/0                           |
| TGL1#      | chr1       | 677459   | Gac/Aac           | D154N             | Abhydrolase_1   | 0                 | 0/0/0                           |
| RAD5       | chr3       | 696403   | tCc/tTc           | S752F             | Outside domain  | 0.02              | 0/0/0                           |
| DNL4       | chr3       | 1411937  | atG/atA           | M285I             | DNA_ligase_A_M  | 0.18              | 0/0/0                           |
| RPO31      | chr4       | 637369   | gAa/gGa           | E779G             | RPOLA_N         | 0.03 <sup>s</sup> | 0/0/0                           |
| YIR007W    | chr4       | 685226   | gGt/gAt           | G324D             | Outside domain  | 0                 | 0/0/0                           |

|             |      |         |         |        |                 |                   |       |
|-------------|------|---------|---------|--------|-----------------|-------------------|-------|
| CRH1        | chr4 | 1129990 | Gtt/Att | V9I    | Blyco_hydro_16  | N/O               | 0/0/0 |
| COS111      | chr4 | 1588323 | aGt/aAt | S235N  | Outside domain  | 0.48              | 0/0/0 |
| MRPS28      | chr2 | 714857  | gGc/gAc | G256D  | Outside domain  | 1                 | 1/1/0 |
| UTP10       | chr2 | 2300595 | gCc/gTc | A1112V | Outside domain  | 0.2               | 1/1/0 |
| YMR253C     | chr2 | 1066732 | gCt/gTt | A320V  | EamA            | 0.01              | 1/1/0 |
| DBP8#       | chr2 | 709207  | Gac/Aac | D269N  | SRP54N          | 0.02 <sup>§</sup> | 1/0/1 |
| HIS4        | chr1 | 1703668 | Tgc/Cgc | C557R  | Histidinol_dh   | 0                 | 1/0/1 |
| FMS1        | chr3 | 1810776 | tgG/tgA | W57*   | NAD_binding_8   | N/A-stop          | 1/0/1 |
| NAB3        | chr3 | 414260  | Gag/Aag | E227K  | Outside domain  | 0.03              | 1/0/1 |
| LCB5        | chr3 | 794870  | Cct/Tct | P259S  | Outside domain  | 0.43              | 1/0/1 |
| PEX28       | chr3 | 1722712 | Gtg/Atg | V448M  | Pex24p          | 0                 | 1/0/1 |
| PRP21#      | chr4 | 217542  | Gtt/Att | V107I  | Outside domain  | 0.27              | 1/0/1 |
| MASY_PICAN  | chr4 | 425779  | Cct/Tct | P478S  | Malate_synthase | 0 <sup>§</sup>    | 1/0/1 |
| AVT2        | chr4 | 678710  | Gag/Aag | E359K  | Aa_trans        | 0.33              | 1/0/1 |
| SFB3        | chr4 | 988521  | Gct/Act | A3T    | Outside domain  | 0 <sup>§</sup>    | 1/0/1 |
| PIR_HUMAN   | chr1 | 1675511 | Taa/Caa | *304Q  | Outside domain  | N/A-stop          | 2/2/0 |
| PEX22_PICPA | chr3 | 1131355 | Ccc/Tcc | P34S   | Outside domain  | 0.73              | 2/2/0 |
| SMC3        | chr2 | 1805135 | Cac/Tac | H2Y    | Outside domain  | 1                 | 3/1/2 |
| EXO1        | chr4 | 989019  | Cca/Tca | P83S   | XPGN            | 0.15              | 3/1/2 |
| YDR248C     | chr1 | 1973428 | cCg/cTg | P9L    | Outside domain  | 0.13              | 6/6/0 |

\*Denotes a stop codon in translated gene product

# Denotes genes with a controversial annotation

§ Denotes low confidence SIFT prediction.

N/A denotes that SIFT analysis is not applicable based on the mutation type.

N/O denotes that no orthogroups were found for this gene in the Fungal Orthogroups Repository.
