# Supplementary material for: Comparative genomics and transcriptomics of Pichia pastoris
Source: PubMed Central journal article supplement (PMC4974788; doi:10.1186/s12864-016-2876-y), 2016-08-05
Supplement: 12864_2016_2876_MOESM12_ESM.pdf [file 12864_2016_2876_MOESM12_ESM.pdf]

**Table S11: Summary of genic mutational variants found in GS115**

|                       | <b>GS115 to WT</b> | <b>WT to GS115</b> | <b>Reciprocal mutations with impact on protein sequence</b> |
|-----------------------|--------------------|--------------------|-------------------------------------------------------------|
| Insertions            | 5                  | 4                  | 0                                                           |
| Deletions             | 25                 | 18                 | 0                                                           |
| Synonymous coding     | 23                 | 43                 | N/A                                                         |
| Non-synonymous coding | 38                 | 63                 | 32                                                          |
| Start gained          | 1                  | 0                  | 0                                                           |
| Start lost            | 1                  | 0                  | 0                                                           |
| Stop gained           | 1                  | 1                  | 1                                                           |
| Stop lost             | 1                  | 1                  | 1                                                           |
| 5' UTR                | 2                  | 3                  | 0                                                           |
| 3' UTR                | 7                  | 11                 | 1                                                           |
